# Supplementary material for: Effects of Ion Combinations and Their Concentrations on Denitrification Performance and Gene Expressions of an Aerobic Strain Marinobacter Hydrocarbonoclasticus RAD-2
Source: MDPI journal article supplement (doi:10.3390/microorganisms11081867), 2023-07-25
Supplement: s1 [file s1]

## Supplementary materials

Table S1 The recipe of LB

| Materials     | Weight(g) |
|---------------|-----------|
| Tryptone      | 10        |
| Yeast Extract | 5         |
| NaCl          | 10        |

Notes: Dissolve components in 1 L of distilled water and adjust pH to 7.2.

Table S2 Formulation of DM to test the effect of Cl<sup>-</sup>/Na<sup>+</sup>

| Materials                                                    | Quantity              |
|--------------------------------------------------------------|-----------------------|
| KNO <sub>3</sub>                                             | 2.166g                |
| MgSO <sub>4</sub> ·7H <sub>2</sub> O                         | 0.2g                  |
| K <sub>2</sub> HPO <sub>4</sub>                              | 1.0g                  |
| NaAc                                                         | 10g                   |
| the trace-element solution                                   | 10mL                  |
| NaCl/Na <sub>2</sub> SO <sub>4</sub> (0‰, 5‰, 15‰, 25‰, 40‰) | 0g, 5g, 15g, 25g, 40g |

Notes: All these materials are dissolved in 1 L of distilled water and set three parallel for each concentration of NaCl/Na<sub>2</sub>SO<sub>4</sub>. The initial pH of all media was set to 7.2, and all media were autoclaved for 20 minutes at 121 °C.

Table S3 The composition of the trace-element solution

| Materials                                                      | Weight(g) |
|----------------------------------------------------------------|-----------|
| EDTA                                                           | 50        |
| ZnSO <sub>4</sub> ·7H <sub>2</sub> O                           | 3.92      |
| CaCl <sub>2</sub>                                              | 5.5       |
| MnCl <sub>2</sub>                                              | 3.22      |
| FeSO <sub>4</sub> ·7H <sub>2</sub> O                           | 5.0       |
| (NH <sub>4</sub> ) <sub>6</sub> Mo <sub>7</sub> O <sub>2</sub> | 1.1       |
| CuSO <sub>4</sub> ·5H <sub>2</sub> O                           | 1.57      |
| CoCl <sub>2</sub> ·6H <sub>2</sub> O                           | 1.61      |

Notes: All these materials are dissolved in 1 L of distilled water and adjust pH to 7.2.

Table S4 Formulation of basic NaCl/Na<sub>2</sub>SO<sub>4</sub> DM for qPCR

| Materials                            | Quantity         |
|--------------------------------------|------------------|
| KNO <sub>3</sub>                     | 2.166g           |
| MgSO <sub>4</sub> ·7H <sub>2</sub> O | 0.2g             |
| KAc                                  | 11.964g          |
| the trace-element solution           | 10mL             |
| NaCl/Na <sub>2</sub> SO <sub>4</sub> | 0.3M, 0.6M, 0.9M |

Notes: All these materials are dissolved in 1 L of distilled water. The initial pH of all media was set to 7.2, and all media were autoclaved for 20 minutes at 121 °C.

Table S5 Names and sequences of primers for qPCR amplification

| Abbreviation | Name                           | Sequence (5'→3')      |
|--------------|--------------------------------|-----------------------|
| 16S rRNA     | 16S ribosomal RNA              | CCTACGGGAGGCAGCAG     |
|              |                                | ATTACCGCGGCTGCTGG     |
| NapA         | periplasmic dissimilatory      | GCAACGTAGCCAAGTACAG   |
|              | nitrate reductase              | TTCGCAAGAGCAGATCCAG   |
| NasA         | assimilatory nitrate reductase | AACGCCATCATTAAGTACC   |
|              |                                | TGCCAGAAATCCGAAACCC   |
| NasB         | assimilatory nitrate reductase | TGATTACCCACGATGTGGAC  |
|              | (electron transfer subunit)    | ACAGGAACGACAACACCTC   |
| NirD         | nitrite reductase large        | TTACCCTGGAGAACCGCTAC  |
|              | subunit                        | GCCATTGCCACACACATAC   |
| NirX         | nitrite reductase              | TGCCAAGATTGTTCGCTCC   |
|              |                                | GCCGTAAGTATGATAAACGCC |
| NorB         | nitric oxide reductase         | GCAACCCACGATAACCAAG   |
|              |                                | GAAGGAGAACAGCCACAATAC |
| NosZ         | nitrous-oxide reductase        | GGTGAAGGAGGGTGATGAAG  |
|              |                                | GGAGAGCATGACAGAACCAG  |
| GLUD         | NAD-glutamate                  | CCTTCAACCACATCCACATC  |
|              | dehydrogenase                  | CCCAGCAGCTTTTTCATTTC  |
| GLUS         | glutamate synthase large       | CAGGAATATCACGCCTTCAAC |
|              | subunit                        | ATTGACTGGATGCCCTCAC   |

---

|      |                          |                       |
|------|--------------------------|-----------------------|
| AT   | 2acetyltransferase_F     | AACCGAAGCCTATATCGCC   |
|      | 2acetyltransferase_R     | CCCACCTTGTTAAGAATGACC |
| CS   | 2citrate synthase_F      | CCCAGCGAAGAAGAAAACAAG |
|      | 2citrate synthase_R      | CGTGATAGAACGCAGACAG   |
| CT   | 2carboxyl transferase_F  | ATCACCGACGAAATCAGCC   |
|      | 2carboxyl transferase_R  | ATGCAGCTCGTCAAAATCC   |
| AK   | 2acetate kinase_F        | GCTTACCGATACGCACTACC  |
|      | 2acetate kinase_R        | TGATGCTACAACCGTTACCC  |
| MT   | 2S-malonyltransferase_F  | GCTCAAGCAGCTATACTCAC  |
|      | 2S-malonyltransferase_R  | TCAGCCAGAGAATCAGGAC   |
| NhaB | sodium/proton antiporter | GCAACTTCTTCTACAACGACC |
|      |                          | GCAGTAGTCATCCAGAATGCC |
| CL   | chloride channel         | AATGGCCACTGGAGCATTTC  |
|      | protein(Marinbacter)     | ATGAACGATGCCGACTTTGC  |
| OSMC | osmotically inducible    | GCAACTTCTTCTACAACGACC |
|      | peroxiredoxin            | GCAGTAGTCATCCAGAATGCC |

---
